# Supplementary material
Source: PubMed Central journal article supplement (PMC5125392)

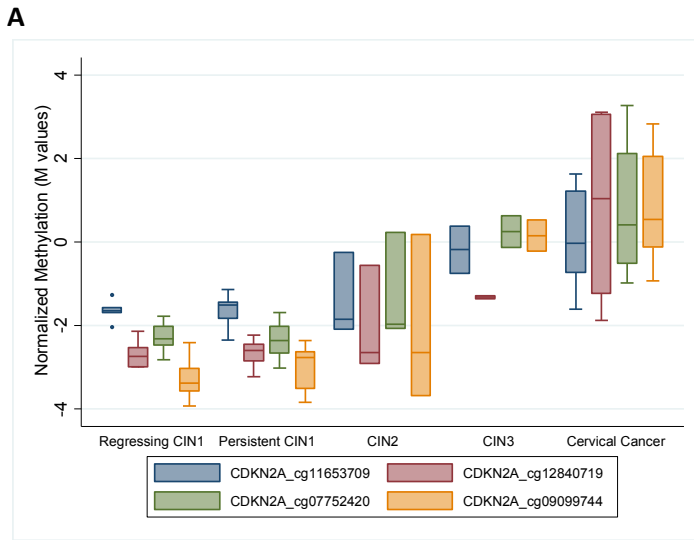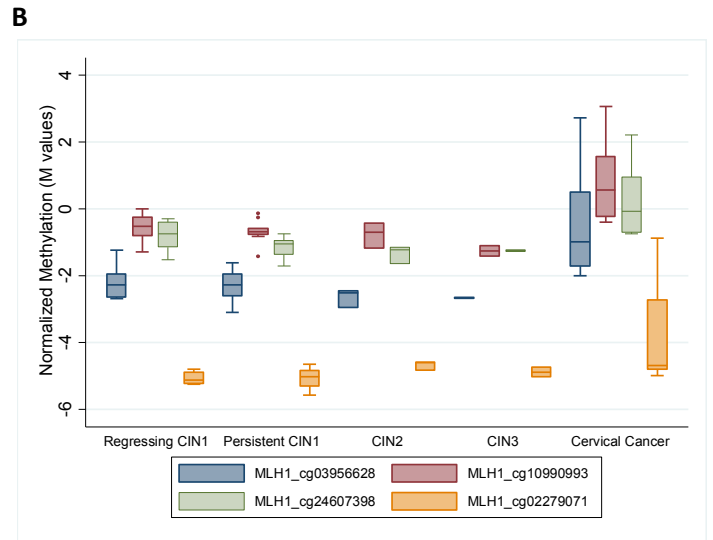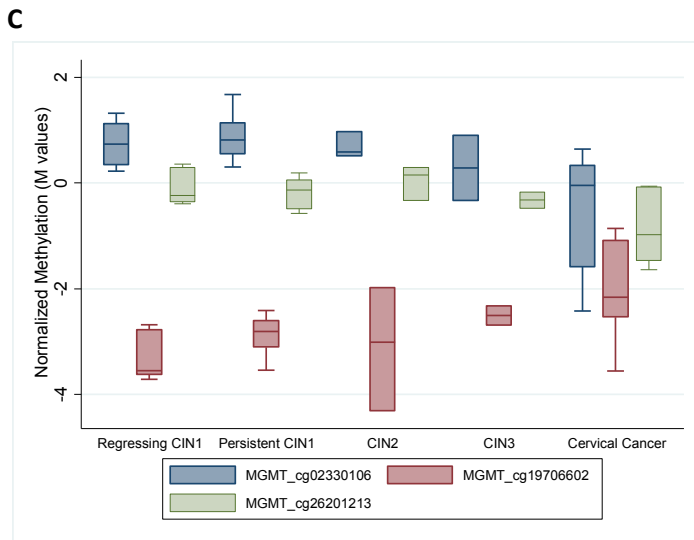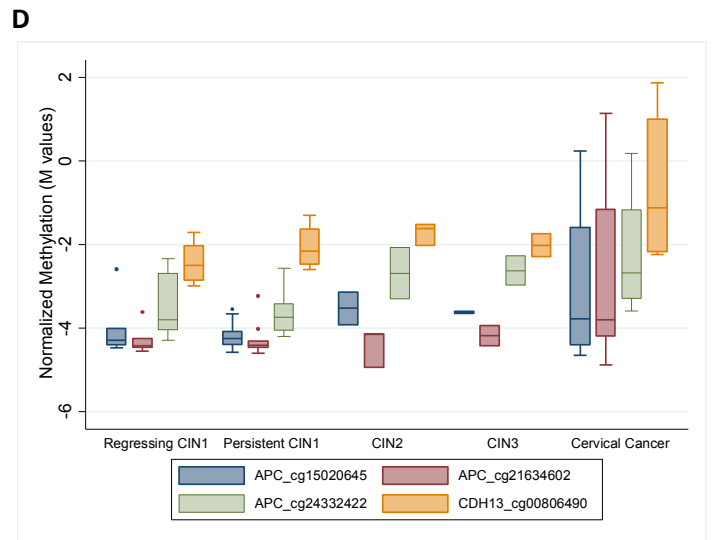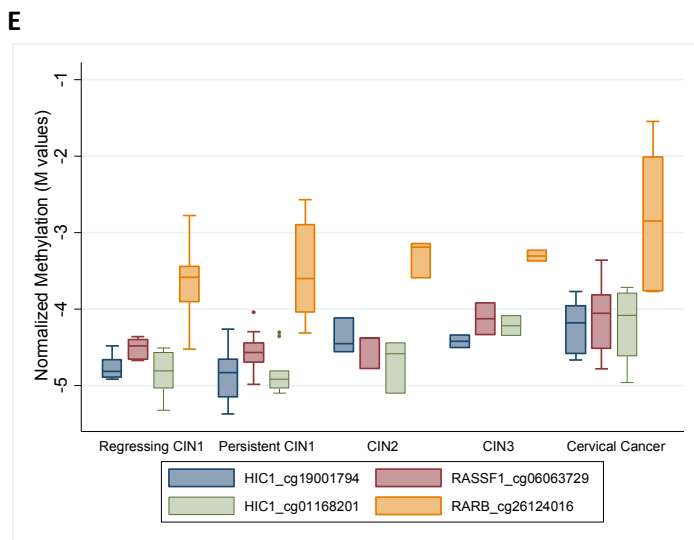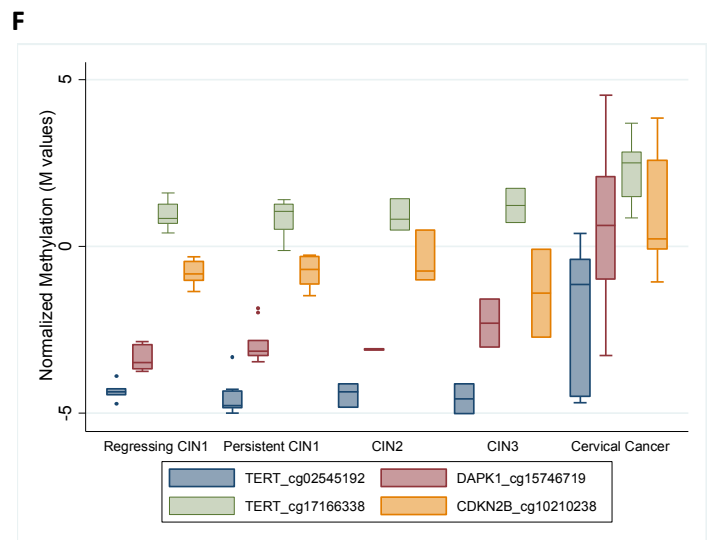

Supplement: NIHMS802079-supplement-1.pdf [file NIHMS802079-supplement-1.pdf]

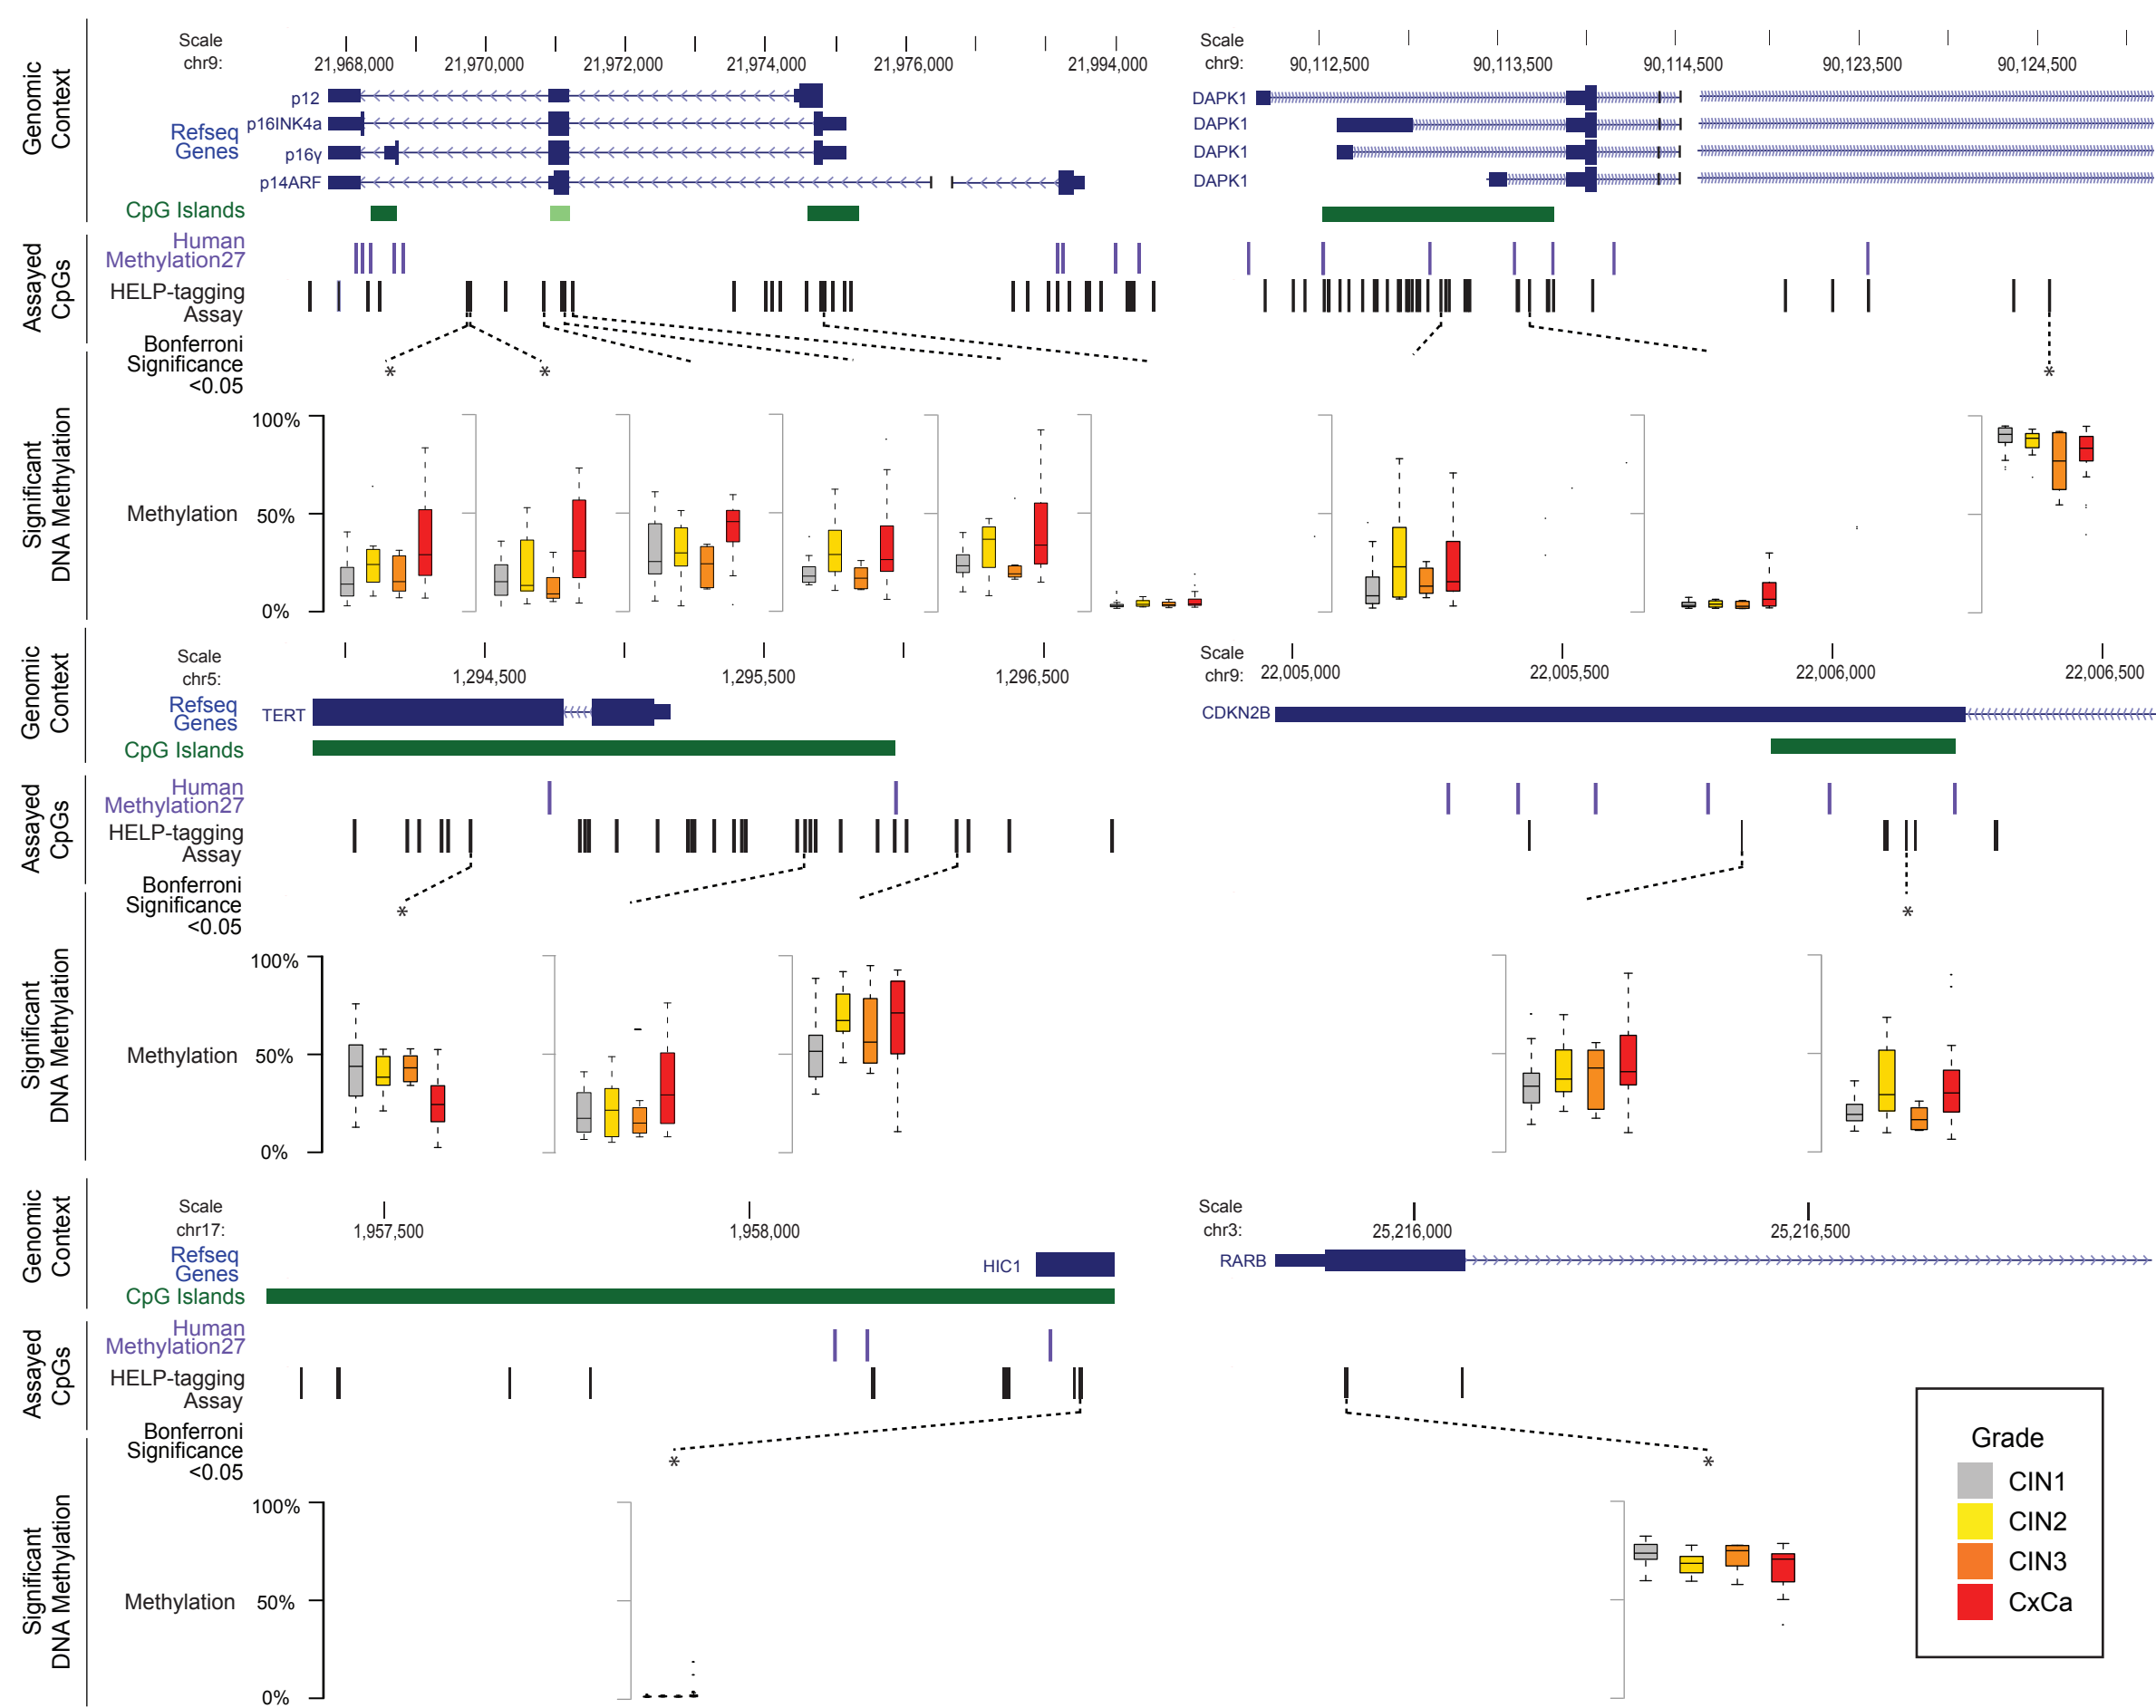

Supplement: NIHMS802079-supplement-2.pdf [file NIHMS802079-supplement-2.pdf]
